# Supplementary material for: Modeling Molecular Pathogenesis of Idiopathic Pulmonary Fibrosis-Associated Lung Cancer in Mice
Source: PubMed Central journal article supplement — Mol Cancer Res. 2023 Nov 28;22(3):295–307. doi: 10.1158/1541-7786.MCR-23-0480 (PMC10906012; doi:10.1158/1541-7786.mcr-23-0480), 2023-11-28

# Modeling Molecular Pathogenesis of Idiopathic Pulmonary Fibrosis-Associated Lung Cancer in Mice

Barravecchia et al.

## Supplemental Figure S1

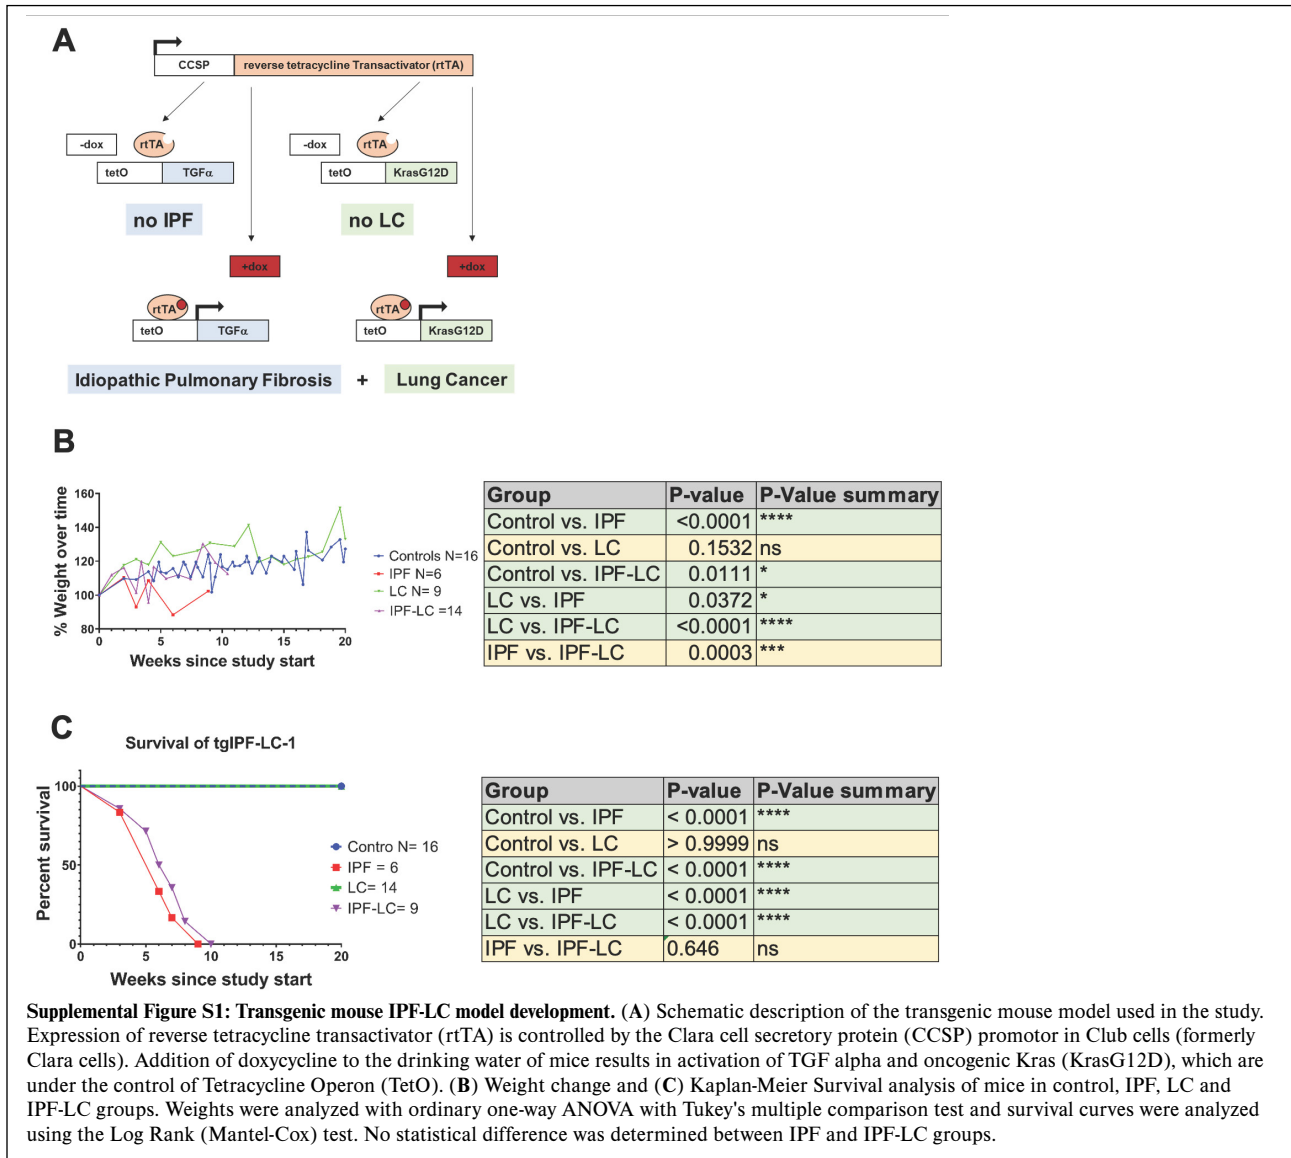

Supplement: mcr-23-0480_supplemental_figure_s1_suppsf1.pdf [file mcr-23-0480_supplemental_figure_s1_suppsf1.pdf]
