# Supplementary material for: Modeling Molecular Pathogenesis of Idiopathic Pulmonary Fibrosis-Associated Lung Cancer in Mice
Source: PubMed Central journal article supplement — Mol Cancer Res. 2023 Nov 28;22(3):295–307. doi: 10.1158/1541-7786.MCR-23-0480 (PMC10906012; doi:10.1158/1541-7786.mcr-23-0480), 2023-11-28
Supplement: mcr-23-0480_supplemental_figure_s2_suppsf2.pdf [file mcr-23-0480_supplemental_figure_s2_suppsf2.pdf]

# Modeling Molecular Pathogenesis of Idiopathic Pulmonary Fibrosis-Associated Lung Cancer in Mice

Barravecchia et al.

## Supplemental Figure S2

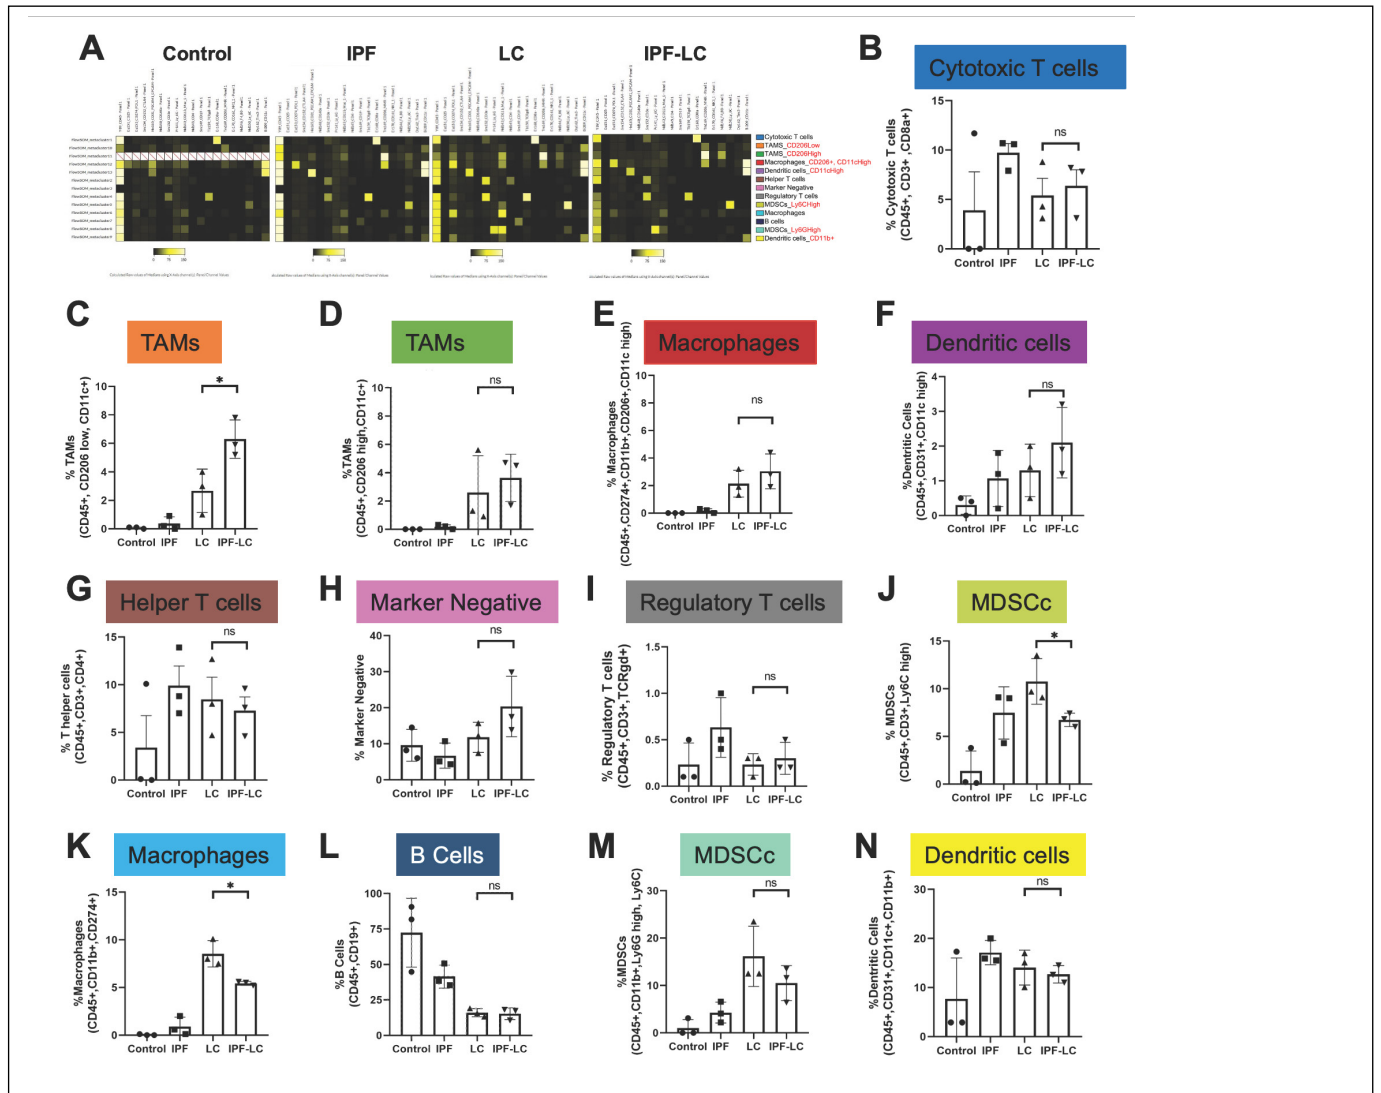

**Supplemental Figure S2: Expression of immune cell surface markers by CyTOF.** CyTOF of at least 3 lungs per experimental group was performed at study endpoint (5 weeks post initial bleomycin injection). (A) Representative heatmaps for each experimental group showing median expression pattern for each immune cluster with corresponding immune cluster identification and quantification of abundance in percent (B-N) for all immune markers analyzed using FlowSOM-visNE. Data +/-SEM with statistical analysis using one-way ANOVA with post-hoc Fisher's Least Significant Difference (LSD), \* denotes p value of < 0.05, n.s. denotes no significance.
