# Supplementary material for: Modeling Molecular Pathogenesis of Idiopathic Pulmonary Fibrosis-Associated Lung Cancer in Mice
Source: PubMed Central journal article supplement — Mol Cancer Res. 2023 Nov 28;22(3):295–307. doi: 10.1158/1541-7786.MCR-23-0480 (PMC10906012; doi:10.1158/1541-7786.mcr-23-0480), 2023-11-28
Supplement: mcr-23-0480_supplemental_table_s1_suppst1.pdf [file mcr-23-0480_supplemental_table_s1_suppst1.pdf]

Modeling Molecular Pathogenesis of Idiopathic Pulmonary Fibrosis-Associated Lung Cancer in Mice  
Barravecchia et al.

**Supplemental Table S1:** Stains and antibodies used for mIHC.

| # | Antigen/Target | Company               | Catalog # | RRID or Reference                                         |
|---|----------------|-----------------------|-----------|-----------------------------------------------------------|
| 1 | DAPI           | Akoya Bioscience      | FP1490    | Simonson et al. <i>Commun Biol.</i> 2022, PMID 35754060   |
| 2 | CK19           | Max Plank Institution | Troma III | Morris et al. <i>J Clin Invest.</i> 2010<br>PMID 20071774 |
| 3 | CD3            | Dako                  | A0452     | RRID:AB_2335677                                           |
| 4 | CD8            | Cell Signaling        | 98941     | RRID:AB_2756376                                           |
| 5 | F4/80          | abcam                 | Ab6640    | RRID:AB_1140040                                           |
| 6 | Arg1           | Cell Signaling        | 93668     | RRID:AB_2800207                                           |
