# Supplementary material for: Modeling Molecular Pathogenesis of Idiopathic Pulmonary Fibrosis-Associated Lung Cancer in Mice
Source: PubMed Central journal article supplement — Mol Cancer Res. 2023 Nov 28;22(3):295–307. doi: 10.1158/1541-7786.MCR-23-0480 (PMC10906012; doi:10.1158/1541-7786.mcr-23-0480), 2023-11-28
Supplement: mcr-23-0480_supplemental_table_s2_suppst2.pdf [file mcr-23-0480_supplemental_table_s2_suppst2.pdf]

Modeling Molecular Pathogenesis of Idiopathic Pulmonary Fibrosis-Associated Lung Cancer in Mice  
Barravecchia et al.

**Supplemental Table S2:** Antibody panel used for CyTOF analysis.

| #  | Antibody Target<br>(Antigen) | Catalog # (Standard<br>BioTools, formerly<br>Fluidigm) | RRID or Reference                                       |
|----|------------------------------|--------------------------------------------------------|---------------------------------------------------------|
| 1  | Ly-6C                        | 3150010B                                               | RRID:AB_2895118                                         |
| 2  | Ly-6G                        | 3141008B                                               | RRID:AB_2814678                                         |
| 3  | CD11b (Mac-1)                | 3143015B                                               | RRID:AB_2811240                                         |
| 4  | CD45                         | 3089005B                                               | RRID:AB_2651152                                         |
| 5  | CD8a                         | 3168003B                                               | RRID:AB_2811241                                         |
| 6  | CD206 (MMR)                  | 3169021B                                               | RRID:AB_2832249                                         |
| 7  | CD19                         | 3149002B                                               | RRID:AB_2814679                                         |
| 8  | CD4                          | 3145002B                                               | RRID:AB_2687832                                         |
| 9  | F4/80                        | 3146008B                                               | RRID:AB_2895117                                         |
| 10 | CD140a                       | 3148018B                                               | Bandura et al. <i>Anal Chem.</i> 2009,<br>PMID 19601617 |
| 11 | CD3e                         | 3152004B                                               | RRID:AB_2687836                                         |
| 12 | TCRgd                        | 3159012B                                               | RRID:AB_2922919                                         |
| 13 | CD152 (CTLA-4)               | 3154008B                                               | Bandura et al. <i>Anal Chem.</i> 2009,<br>PMID 19601617 |
| 14 | CD11c                        | 3209005B                                               | RRID:AB_2811244                                         |
| 15 | CD161 (NK1.1)                | 3170002B                                               | RRID:AB_2885023                                         |
| 16 | CD274 (PD-L1)                | 3153016B                                               | RRID:AB_2687837                                         |
| 17 | EPCAM (*NEW)                 | 3141006B                                               | RRID:AB_2687653                                         |
| 18 | CD31 (PECAM-1)               | 3165013B                                               | RRID:AB_2801434                                         |
